# Supplementary material for: Weighted Frequent Gene Co-expression Network Mining to Identify Genes Involved in Genome Stability
Source: PLOS journal article supplement (doi:10.1371/journal.pcbi.1002656), 2012-08-30

**Figure S3: Overlaps among cancer network 1 identified from different QCM parameter settings.** The numbers in each the upper row indicate the size of the network after merging. The two numbers in the lower row are  $\gamma$  and  $\beta$  values respectively for each QCM mining results. The overlapping area of any two circles indicates the number of common genes shared with the two networks.

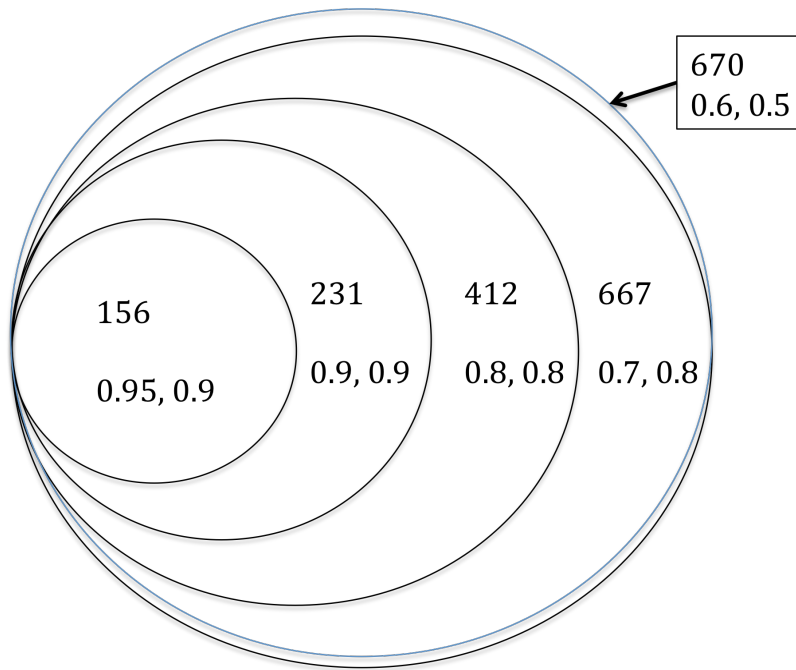

Supplement: S3 (10.1371/journal.pcbi.1002656.s003) [file journal.pcbi.1002656.s003]
