# Supplementary material for: Weighted Frequent Gene Co-expression Network Mining to Identify Genes Involved in Genome Stability
Source: PLOS journal article supplement (doi:10.1371/journal.pcbi.1002656), 2012-08-30
Supplement: S6 (10.1371/journal.pcbi.1002656.s006) [file journal.pcbi.1002656.s006]

**Table S3: Comparison of the top three major networks identified from Cancer vs. normal tissue microarray datasets using different parameter settings.**

| QCM parameter setting       | Networks from cancer datasets     | Networks from normal tissue datasets | Common genes shared by top networks from cancer and normal datasets |
|-----------------------------|-----------------------------------|--------------------------------------|---------------------------------------------------------------------|
| $\beta = 0.5, \gamma = 0.6$ | Size: 670, BF: cell cycle         | Size: 152, BF: cellular respiration  | 43                                                                  |
|                             | Size: 603, BF: immune response    | Size: 147, BF: protein synthesis     |                                                                     |
|                             | Size: 555, BF: cell cycle         | Size: 126, BF: Cellular respiration  |                                                                     |
| $\beta = 0.5, \gamma = 0.7$ | Size: 481, BF: cell cycle         | Size: 152, BF: cellular respiration  | 27                                                                  |
|                             | Size: 381, BF: cell cycle         | Size: 147, BF: protein synthesis     |                                                                     |
|                             | Size: 333, BF: immune response    | Size: 126, BF: Cellular respiration  |                                                                     |
| $\beta = 0.5, \gamma = 0.8$ | Size: 462, BF: cell cycle         | Size: 75, BF: Cellular respiration   | 66                                                                  |
|                             | Size: 191, BF: immune response    | Size: 70, BF: unknown                |                                                                     |
|                             | Size: 144, BF: protein synthesis  | Size: 69, BF: protein synthesis      |                                                                     |
| $\beta = 0.8, \gamma = 0.7$ | *Size: 667, BF: cell cycle        | *Size: 198, BF: cellular respiration | 84                                                                  |
|                             | *Size: 442, BF: immune response   | *Size: 71, BF: protein synthesis     |                                                                     |
|                             | *Size: 171, BF: protein synthesis | *Size: 60, BF: unknown               |                                                                     |
| $\beta = 0.9, \gamma = 0.7$ | *Size: 654, BF: cell cycle        | *Size: 173, BF: cellular respiration | 73                                                                  |
|                             | *Size: 429, BF: immune response   | *Size: 68, BF: protein synthesis     |                                                                     |
|                             | *Size: 160, BF: protein synthesis | *Size: 59, BF: unknown               |                                                                     |
| $\beta = 0.9, \gamma = 0.8$ | *Size: 399, BF: cell cycle        | *Size: 30, BF: unknown               | 0                                                                   |
|                             | *Size: 266, BF: immune response   | *Size: 19, BF: cellular respiration  |                                                                     |
|                             | *Size: 134, BF: protein synthesis |                                      |                                                                     |

\*size is for the networks after merging step. BF: biological function. The above table does not include the results from  $\beta = 0.8, \gamma = 0.8$ , which were shown in the manuscript.
